# Supplementary material for: Identification and integrative analysis of ACLY and related gene panels associated with immune microenvironment reveal prognostic significance in hepatocellular carcinoma
Source: PubMed Central journal article supplement (PMC8335999; doi:10.1186/s12935-021-02108-2), 2021-08-03
Supplement: 12935_2021_2108_MOESM15_ESM.pdf [file 12935_2021_2108_MOESM15_ESM.pdf]

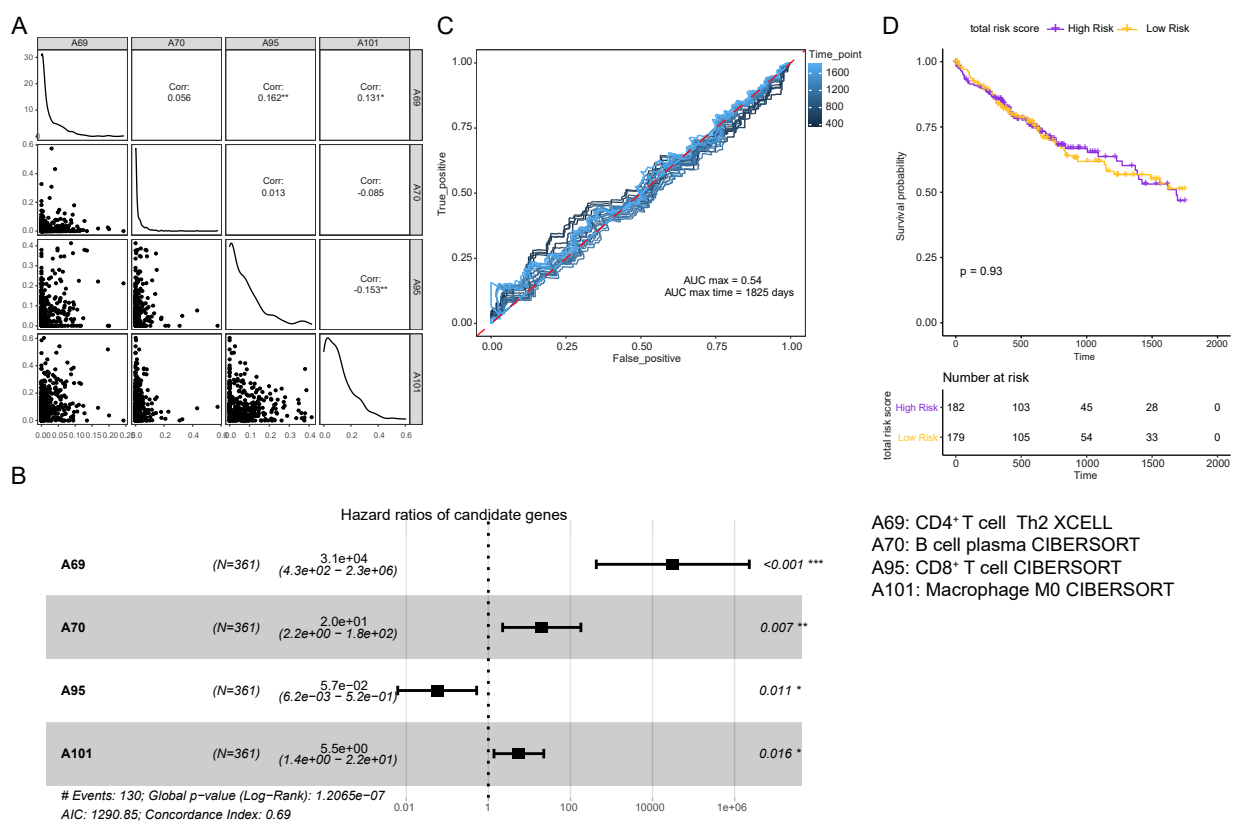

Supplementary Figure 15
